# Supplementary material for: Time since primary transplant and poor functional status predict survival after redo lung transplant
Source: PubMed Central journal article supplement — J Thorac Dis. 2022 Oct;14(10):3819–30. doi: 10.21037/jtd-22-334 (PMC9641320; doi:10.21037/jtd-22-334), 2022-10
Supplement: jtd-14-10-3819-dss.pdf [file jtd-14-10-3819-dss.pdf]

## Data Sharing Statement

|                     |                                                                                                                                                    |                                                                                                                                |
|---------------------|----------------------------------------------------------------------------------------------------------------------------------------------------|--------------------------------------------------------------------------------------------------------------------------------|
| <b>Article Info</b> | https://dx.doi.org/10.21037/jtd-22-334                                                                                                             |                                                                                                                                |
| <b>Item</b>         | <b>Question</b>                                                                                                                                    | <b>Authors' Response<br/>(place "-" if not applicable)</b>                                                                     |
| 1                   | Would you like to share data collected for your study to others?                                                                                   | Yes                                                                                                                            |
| 2                   | If not, would you like to share the reason for your decision?                                                                                      | -                                                                                                                              |
| 3                   | What data in particular will be shared?                                                                                                            | The raw data, in particular, will be shared.                                                                                   |
| 4                   | Any other documents will be share? Such as study protocol, statistical analysis plan, informed consent form, clinical study report, analytic code. | Statistical analysis plan, informed consent form, and study protocol will also be shared if requested.                         |
| 5                   | When will data availability begin?                                                                                                                 | From the publication date.                                                                                                     |
| 6                   | When will data availability end?                                                                                                                   | Two years within the publication date.                                                                                         |
| 7                   | To whom will you share the data?                                                                                                                   | Cardiothoracic surgeons interested in lung transplantation.                                                                    |
| 8                   | For what type of analysis or purpose?                                                                                                              | For analysis to assess or evaluate the timing of redo lung transplantation.                                                    |
| 9                   | How or where can the data/documents be obtained?                                                                                                   | Emails could be sent to the address below to obtain the shared data:<br><a href="mailto:huddl007@umn.edu">huddl007@umn.edu</a> |
| 10                  | Any other restrictions?                                                                                                                            | We may balance the potential benefits and risks for each request and then provide the data that could be shared.               |
