# Supplementary material for: Time since primary transplant and poor functional status predict survival after redo lung transplant
Source: PubMed Central journal article supplement — J Thorac Dis. 2022 Oct;14(10):3819–30. doi: 10.21037/jtd-22-334 (PMC9641320; doi:10.21037/jtd-22-334), 2022-10
Supplement: jtd-14-10-3819-supplementary.pdf [file jtd-14-10-3819-supplementary.pdf]

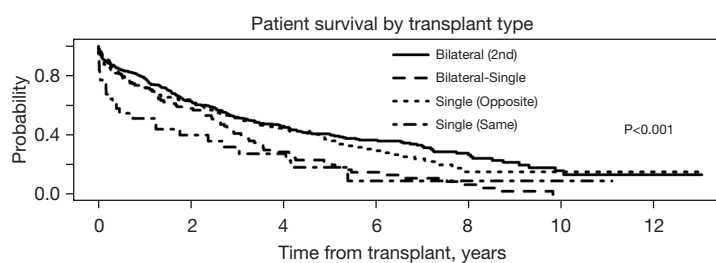

**Figure S1** Kaplan-Meier survival analysis according to type of re-transplant [repeat bilateral (2nd), initial bilateral followed by single (Bilateral-Single), single re-transplant for opposite lung (Opposite), and same lung (Same)]. Patients undergoing a second bilateral transplant had the greatest probability of survival, whereas those undergoing a re-transplant on the same lung had the lowest survival ( $P < 0.001$ ).
